# Supplementary material for: Modular syntheses of H4octapa and H2dedpa, and yttrium coordination chemistry relevant to86Y/90Y radiopharmaceuticals
Source: Royal Society of Chemistry journal article supplement (doi:10.1039/c4dt00239c), 2014-01-01
Supplement: c4dt00239c1.pdf [file c4dt00239c1.pdf]

**Electronic supplementary information**

**Improved Modular Synthesis of H<sub>4</sub>octapa and H<sub>2</sub>dedpa, and Yttrium Coordination Chemistry Towards <sup>86/90</sup>Y Radiopharmaceuticals.**

Eric W. Price<sup>†,§</sup>, Jacqueline F. Cawthray<sup>†,§</sup>, Michael J. Adam<sup>§</sup>, and Chris Orvig<sup>\*,†</sup>

*†Medicinal Inorganic Chemistry Group, Department of Chemistry, University of British Columbia, 2036 Main Mall, Vancouver, British Columbia, Canada, V6T 1Z1;*

*§TRIUMF, 4004 Wesbrook Mall, Vancouver, British Columbia, Canada, V6T 2A3;*

columned CDCl3 amber\_001000fid

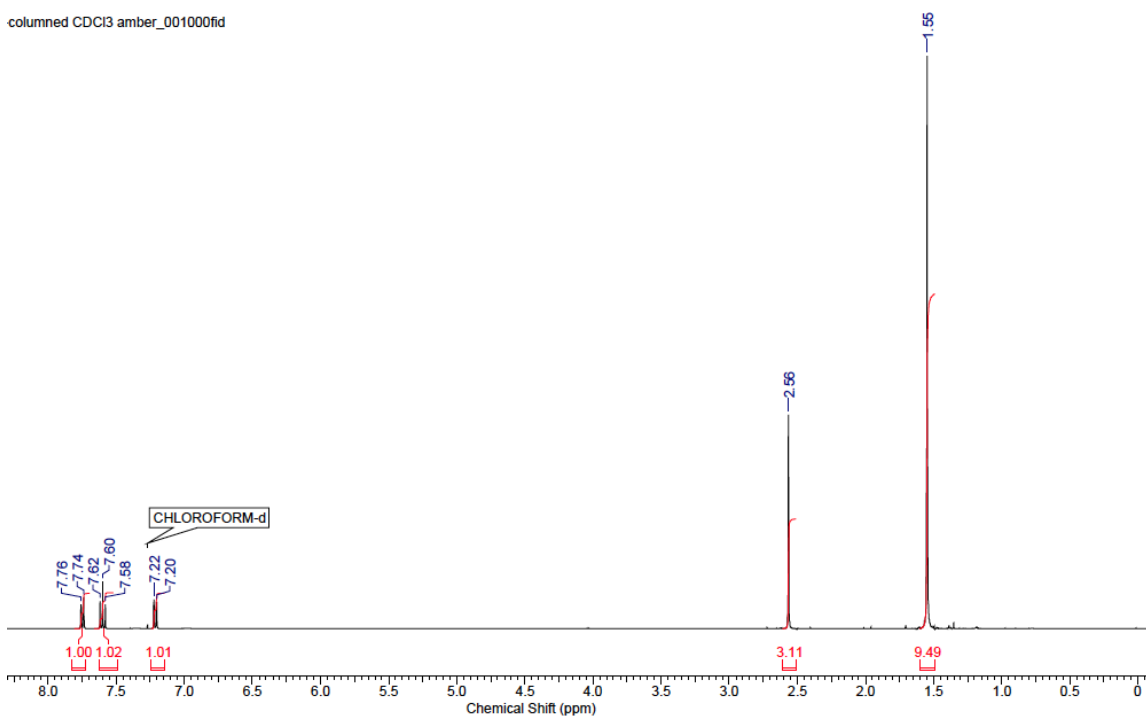

**Supplementary Figure S1.** <sup>1</sup>H NMR spectrum (400 MHz, CDCl<sub>3</sub>, RT) of *tert*-Butyl 6-(methyl)picolinate (1).

columned CDCl3 amber\_002000fid

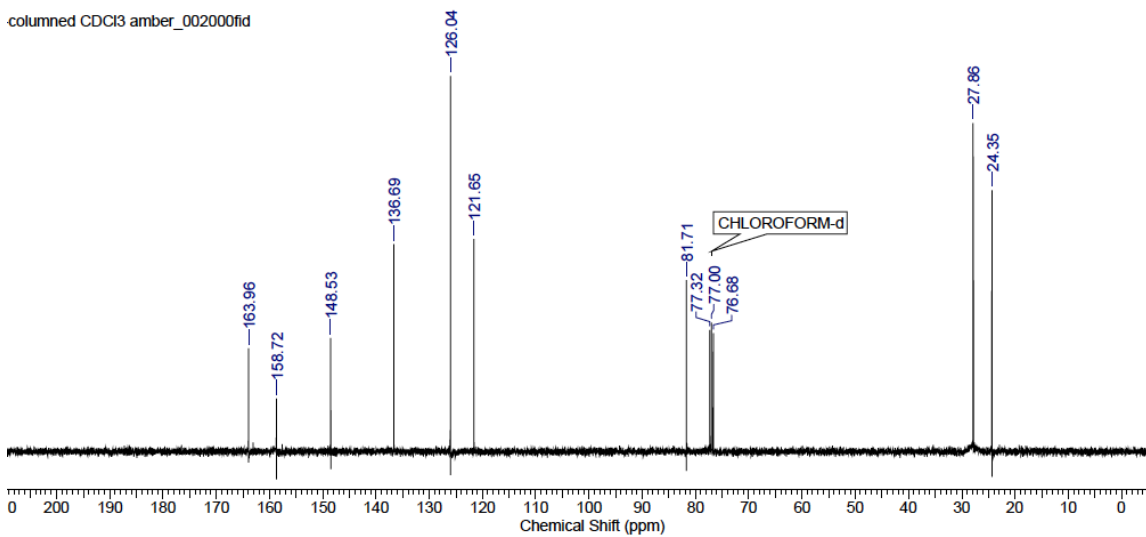

**Supplementary Figure S2.** <sup>13</sup>C NMR spectrum (100 MHz, CDCl<sub>3</sub>, RT) of *tert*-Butyl 6-(methyl)picolinate (1).

r Br-Pic-tBuester CDCl3 F37-44\_001000fid

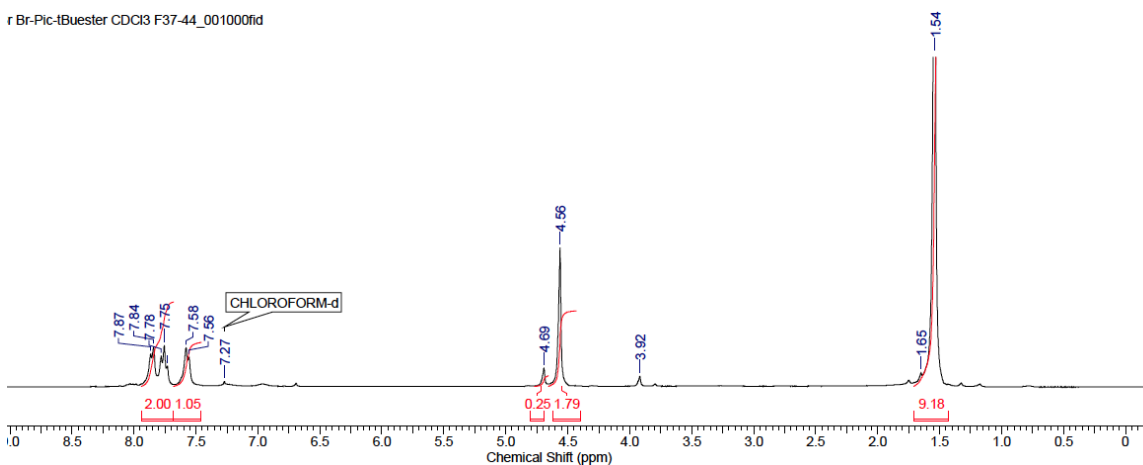

**Supplementary Figure S3.**  $^1\text{H}$  NMR spectrum (300 MHz,  $\text{CDCl}_3$ , RT) of *tert*-Butyl 6-(bromomethyl)picolinate (**2**).

3 F37-44\_002000fid

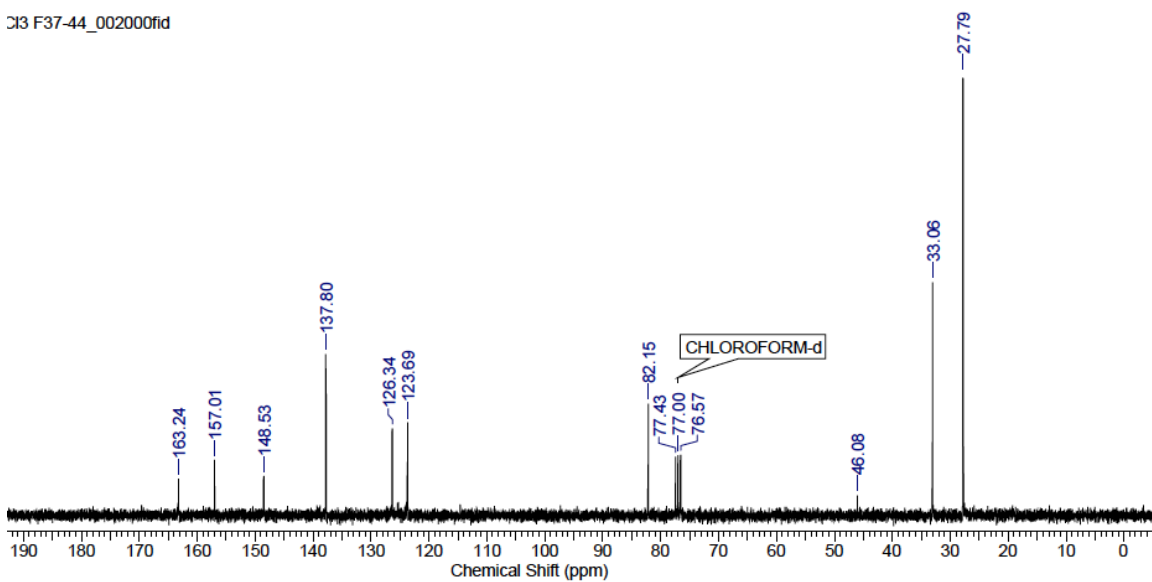

**Supplementary Figure S4.**  $^{13}\text{C}$  NMR spectrum (75 MHz,  $\text{CDCl}_3$ , RT) of *tert*-Butyl 6-(bromomethyl)picolinate (**2**).

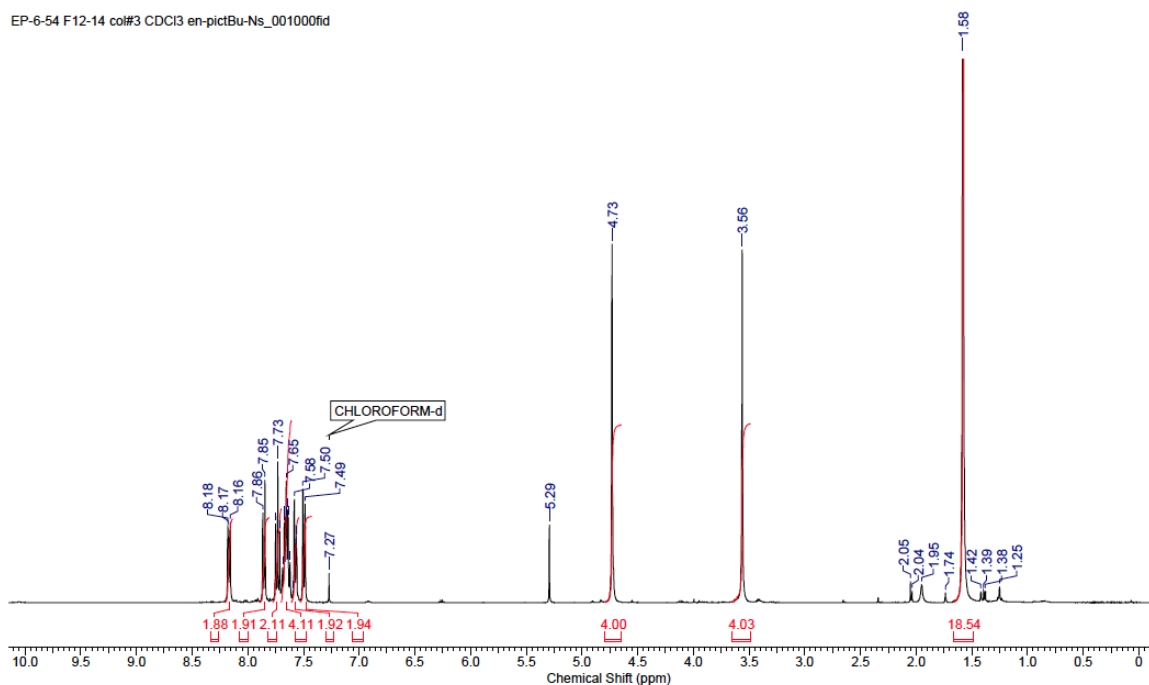

**Supplementary Figure S5.**  $^1\text{H}$  NMR spectrum (400 MHz,  $\text{CDCl}_3$ , RT) of *N,N'*-(2-Nitrobenzenesulfonamide)-*N,N'*-[6-(*tert*-butoxycarbonyl)pyridin-2-yl]methyl]-1,2-diaminoethane (**4**).

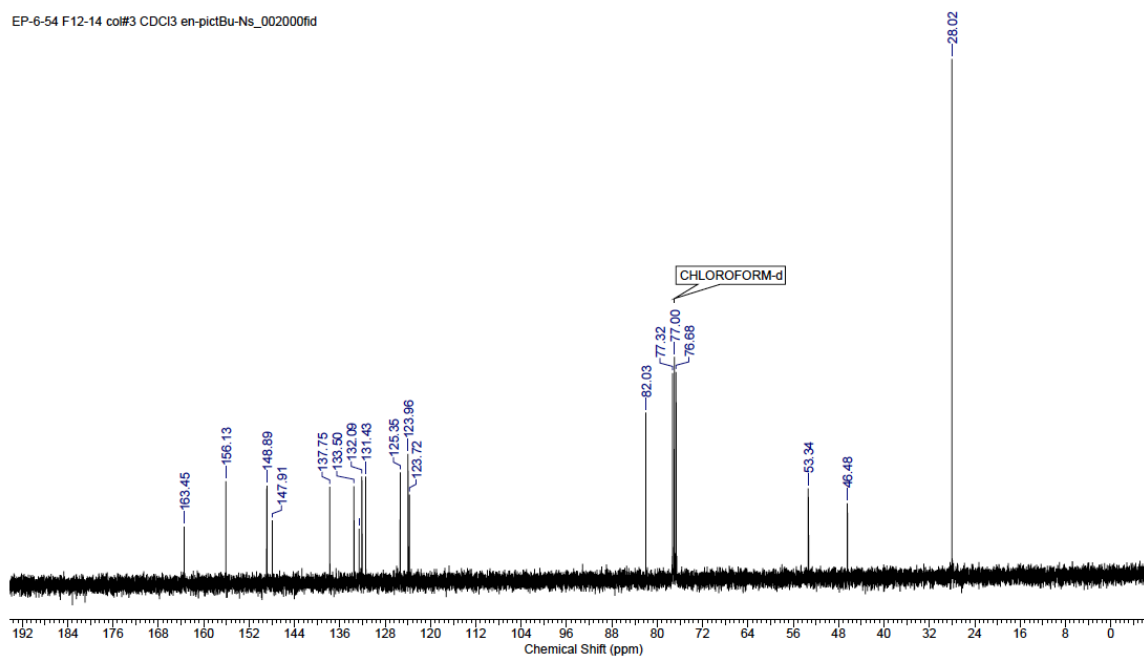

**Supplementary Figure S6.**  $^{13}\text{C}$  NMR spectrum (100 MHz,  $\text{CDCl}_3$ , RT) of *N,N'*-(2-Nitrobenzenesulfonamide)-*N,N'*-[6-(*tert*-butoxycarbonyl)pyridin-2-yl]methyl]-1,2-diaminoethane (**4**).

P-6-54-DEP CDCl3 tBu2-dedpa\_001000fid

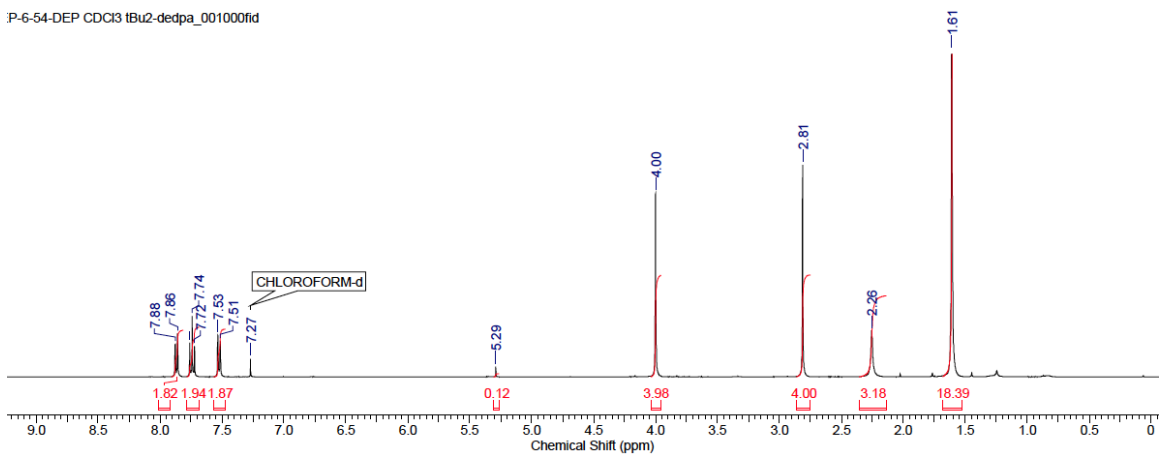

**Supplementary Figure S7.**  $^1\text{H}$  NMR spectrum (400 MHz,  $\text{CDCl}_3$ , RT) of  $N,N'$ -[6-(*tert*-Butoxycarbonyl)pyridin-2-yl]methyl-1,2-diaminoethane (5).

ledpa\_002000fid

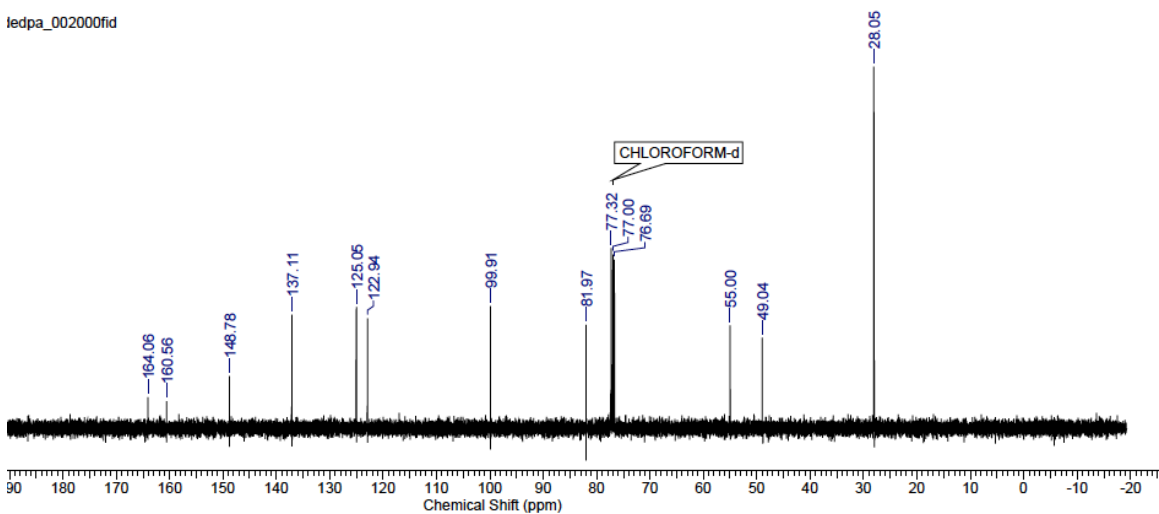

**Supplementary Figure S8.**  $^{13}\text{C}$  NMR spectrum (100 MHz,  $\text{CDCl}_3$ , RT) of  $N,N'$ -[6-(*tert*-Butoxycarbonyl)pyridin-2-yl]methyl-1,2-diaminoethane (5).

EP-6-62-DEPTFA-LiOH 14.9m MeOD H2dedpa-TFA-2\_001000fid

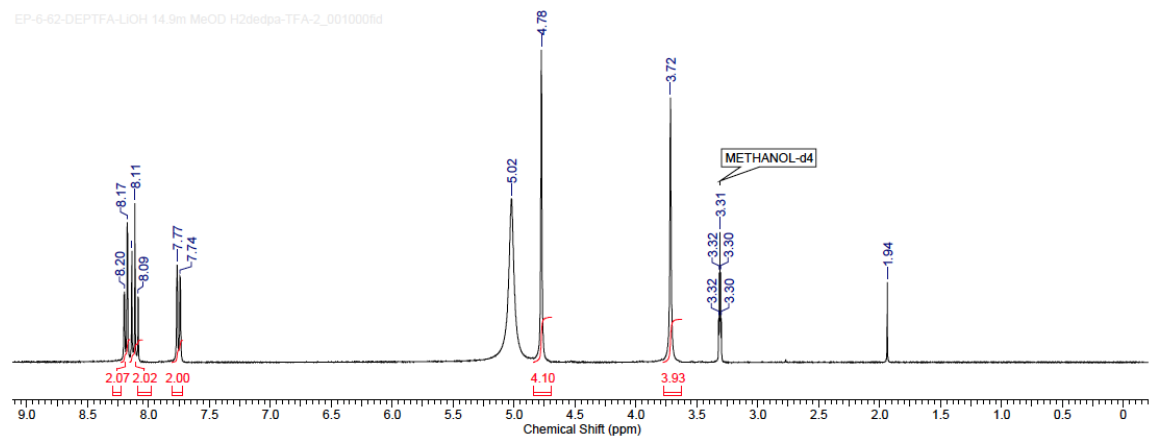

**Supplementary Figure S9.**  $^1\text{H}$  NMR spectrum (300 MHz, MeOD, RT) of  $\text{H}_2\text{dedpa}$ ,  $N,N'$ -[(6-carboxylato)pyridin-2-yl]methyl-1,2-diaminoethane (6).

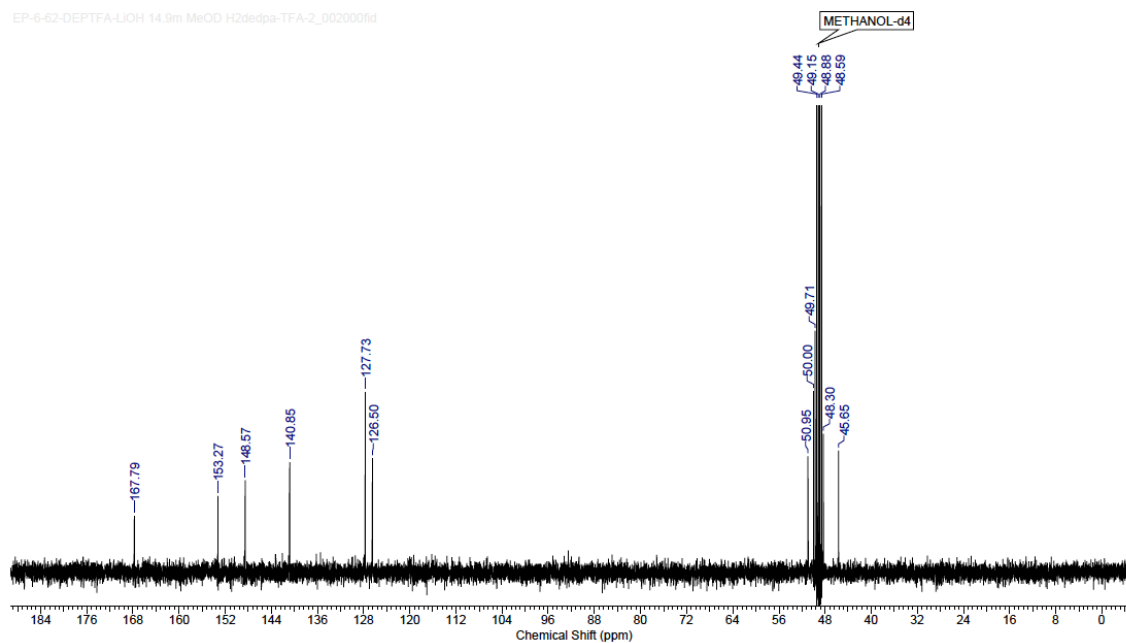

**Supplementary Figure S10.** <sup>13</sup>C NMR spectrum (75 MHz, MeOD, RT) of H<sub>2</sub>dedpa, *N,N'*-[(6-carboxylato)pyridin-2-yl)methyl]-1,2-diaminoethane (6).

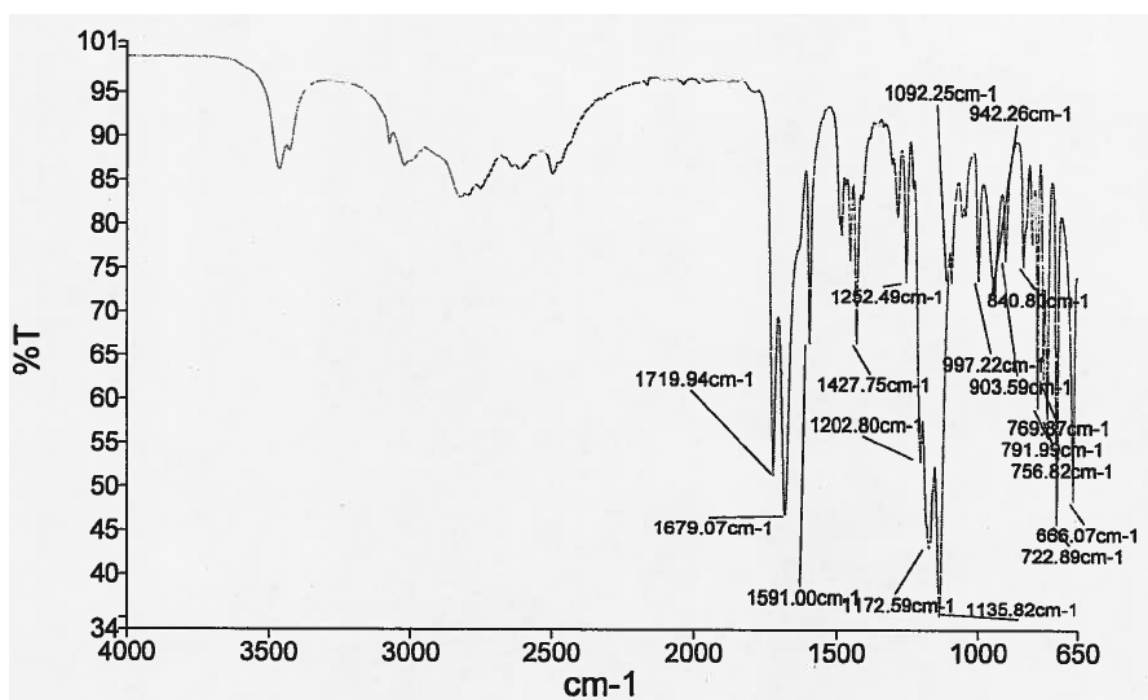

**Supplementary Figure S11.** ATR-IR spectrum (neat) of H<sub>2</sub>dedpa, *N,N'*-[(6-carboxylato)pyridin-2-yl)methyl]-1,2-diaminoethane (6).

EP-6-58 en-tBuPic-Ac CDCl3 33.2mg\_001000fid

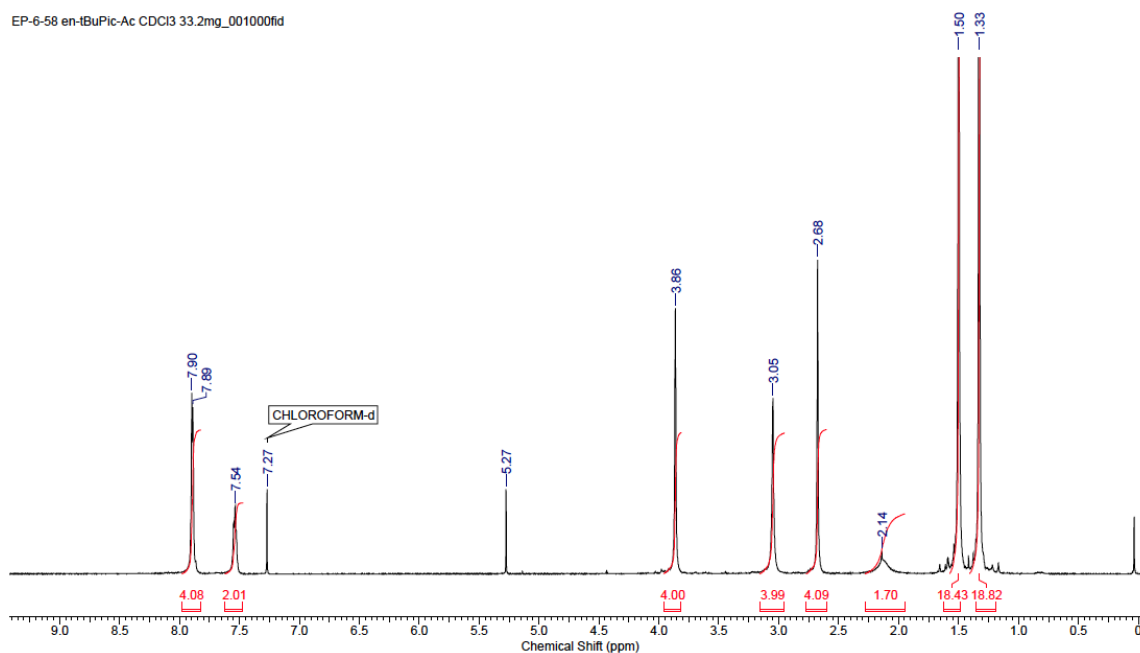

**Supplementary Figure S12.**  $^1\text{H}$  NMR spectrum (400 MHz,  $\text{CDCl}_3$ , RT) of *N,N'*-[*tert*-Butoxycarbonyl)methyl-*N,N'*-[6-(*tert*-butoxycarbonyl)pyridin-2-yl]methyl]-1,2-diaminoethane (7).

EP-6-58 en-tBuPic-Ac CDCl3 33.2mg\_002000fid

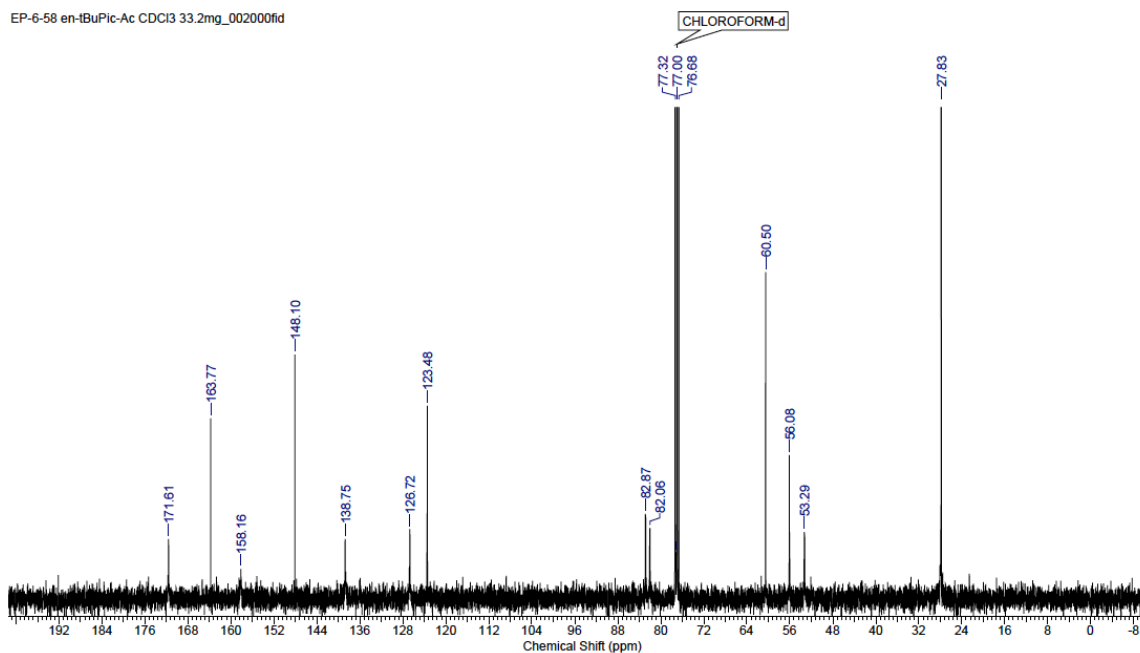

**Supplementary Figure S13.**  $^{13}\text{C}$  NMR spectrum (100 MHz,  $\text{CDCl}_3$ , RT) of *N,N'*-[*tert*-Butoxycarbonyl)methyl-*N,N'*-[6-(*tert*-butoxycarbonyl)pyridin-2-yl]methyl]-1,2-diaminoethane (7).

EP-6-58-DEP H4octapa-TFA MeOD 14.8m HPLC\_001000fid

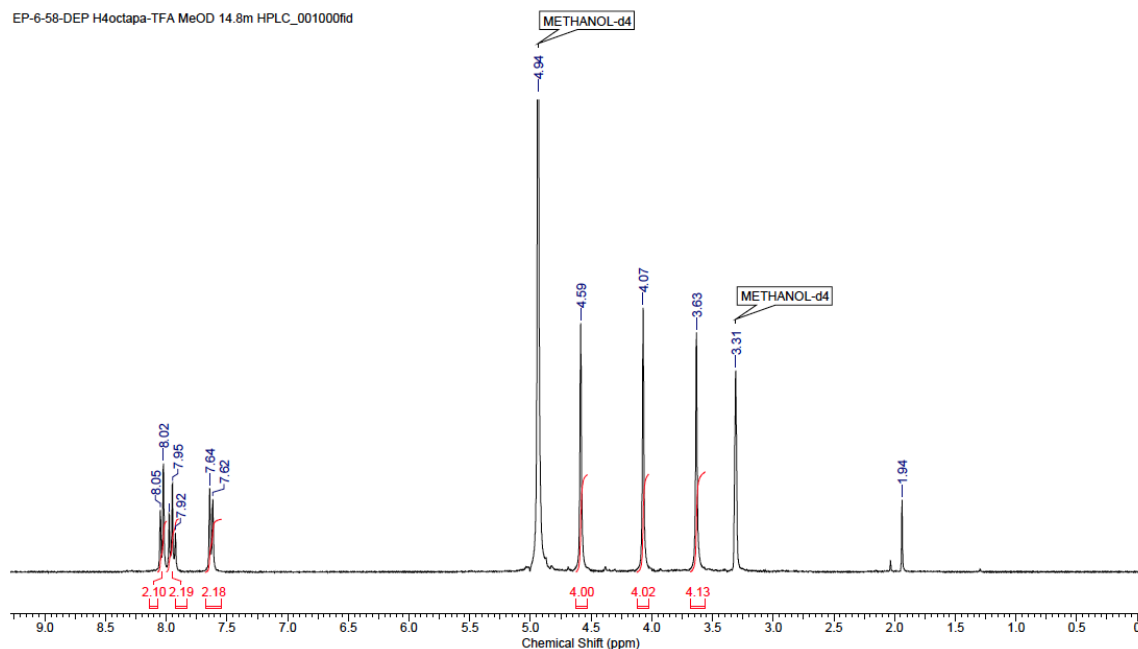

**Supplementary Figure S14.**  $^1\text{H}$  NMR spectrum (300 MHz, MeOD, RT) of  $\text{H}_4\text{octapa}$ ,  $N,N'$ -[(6-carboxylato)pyridin-2-yl)methyl]- $N,N'$ -diacetic acid-1,2-diaminoethane (**8**).

EP-6-58-DEP H4octapa TFA MeOD 14.8m tBu ESTER\_001000fid

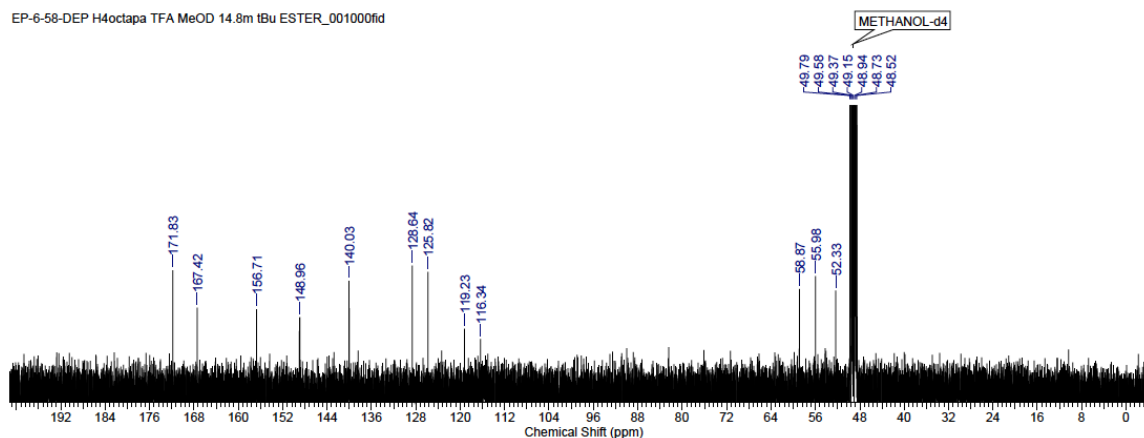

**Supplementary Figure S15.**  $^{13}\text{C}$  NMR spectrum (100 MHz, MeOD, RT) of  $\text{H}_4\text{octapa}$ ,  $N,N'$ -[(6-carboxylato)pyridin-2-yl)methyl]- $N,N'$ -diacetic acid-1,2-diaminoethane (**8**).





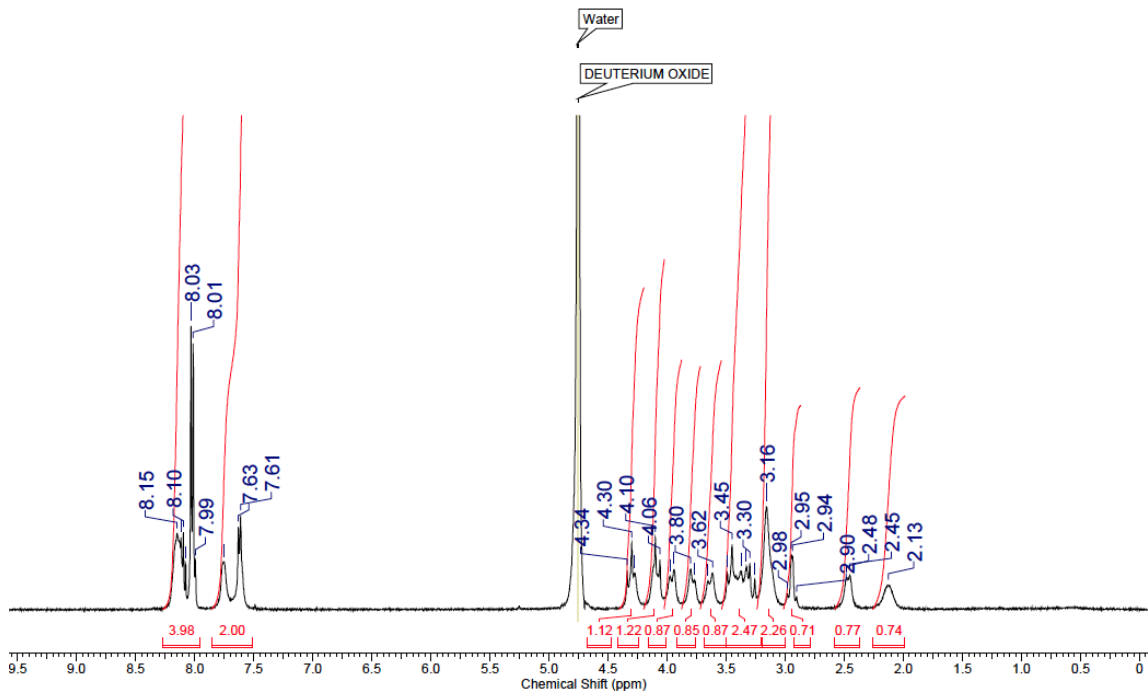

**Supplementary Figure S18.**  $^1\text{H}$  NMR spectrum (400 MHz,  $\text{D}_2\text{O}$ , RT) of  $[\text{Y}(\text{octapa})]^-$  (9).

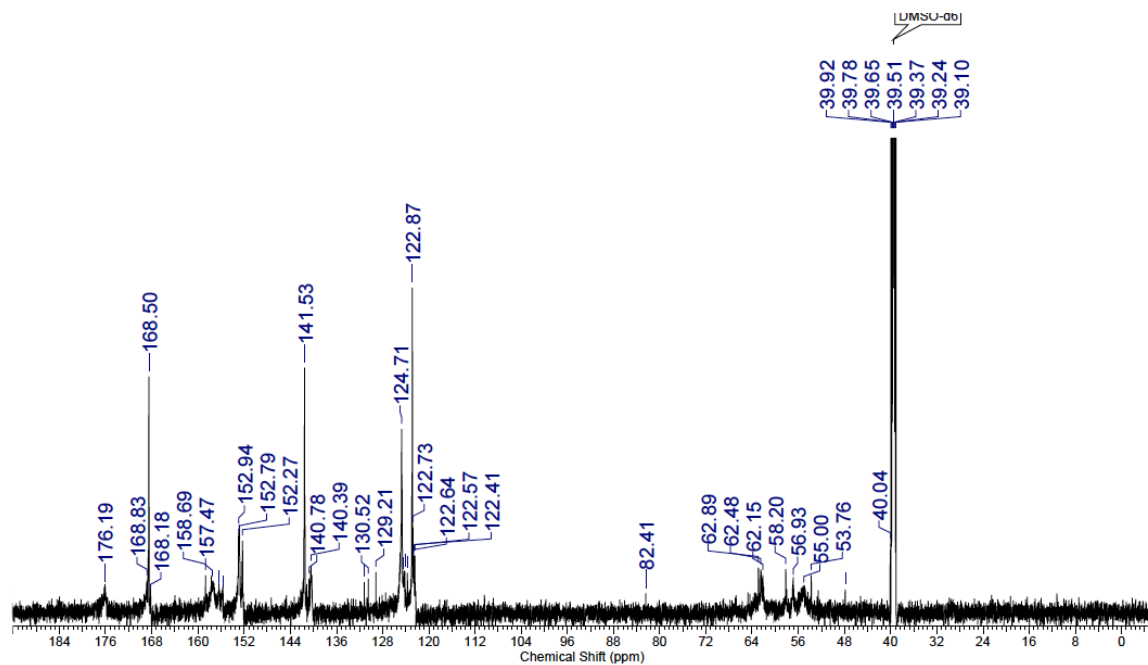

**Supplementary Figure S19.**  $^{13}\text{C}$  NMR spectrum (75 MHz,  $\text{D}_2\text{O}$ , RT) of  $[\text{Y}(\text{octapa})]^-$  (9).

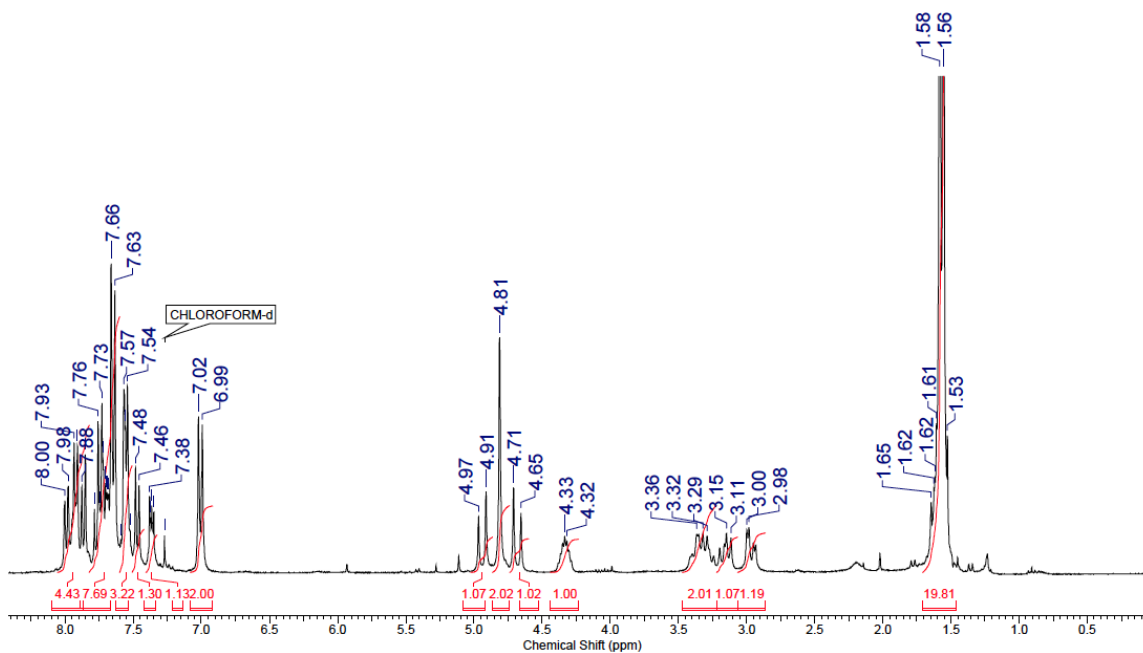

**Supplementary Figure S20.**  $^1\text{H}$  NMR spectrum (300 MHz,  $\text{CDCl}_3$ , RT) of *N,N'*-(2-Nitrobenzenesulfonamide)-*N,N'*-[6-(methoxycarbonyl)pyridin-2-yl]methyl]-1-(*p*-nitrobenzyl)-1,2-diaminoethane (**12**).

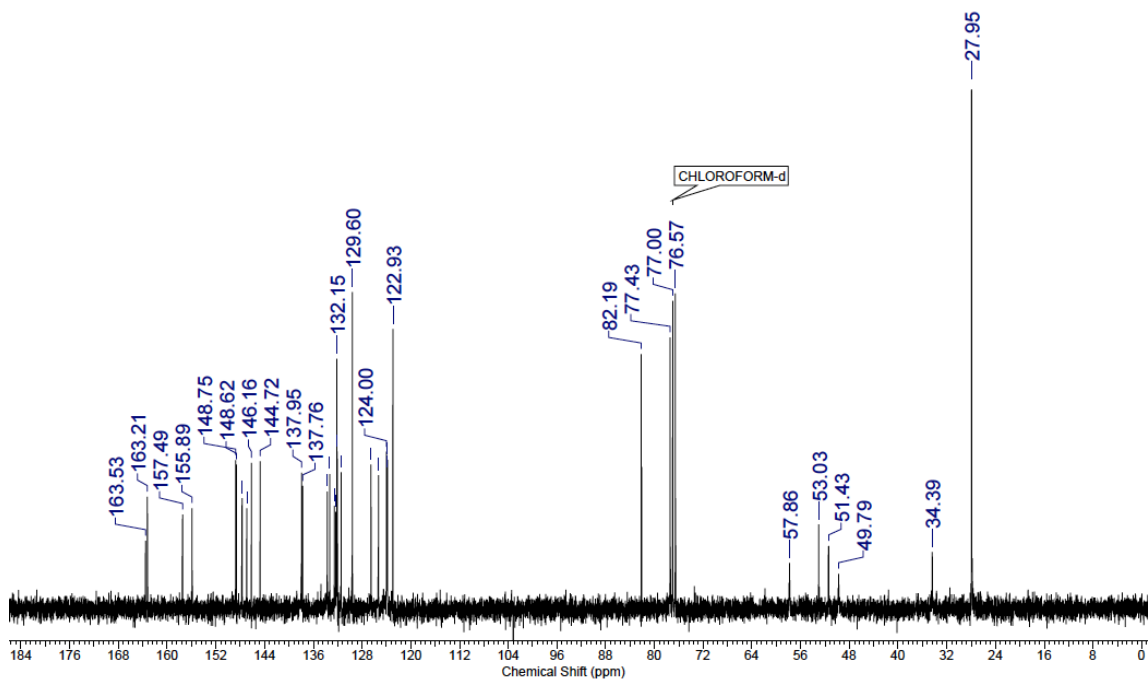

**Supplementary Figure S21.**  $^{13}\text{C}$  NMR spectrum (75 MHz,  $\text{CDCl}_3$ , RT) of *N,N'*-(2-Nitrobenzenesulfonamide)-*N,N'*-[6-(methoxycarbonyl)pyridin-2-yl]methyl]-1-(*p*-nitrobenzyl)-1,2-diaminoethane (**12**).

EP-6-56-DEP NO2-en-tBuPic CDCl3 44mg\_001000fid

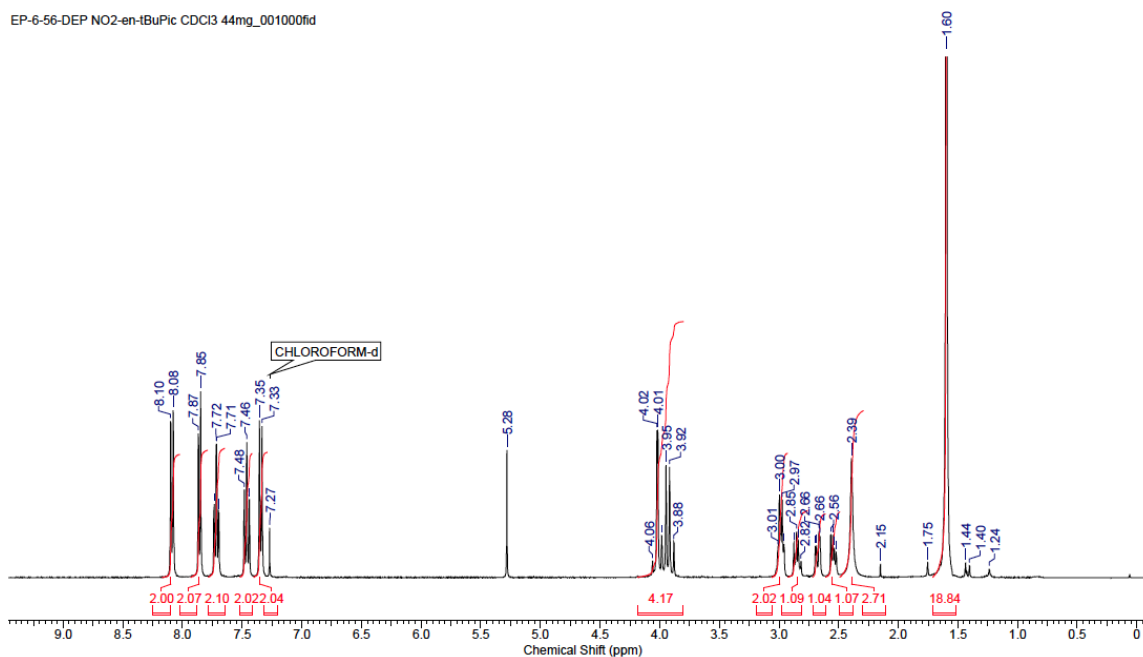

**Supplementary Figure S22.**  $^1\text{H}$  NMR spectrum (400 MHz,  $\text{CDCl}_3$ , RT) of *N,N'*-[6-(Methoxycarbonyl)pyridin-2-yl]methyl]-1-(*p*-nitrobenzyl)-1,2-diaminoethane (13).

EP-6-56-DEP NO2-en-tBuPic CDCl3 44mg\_002000fid

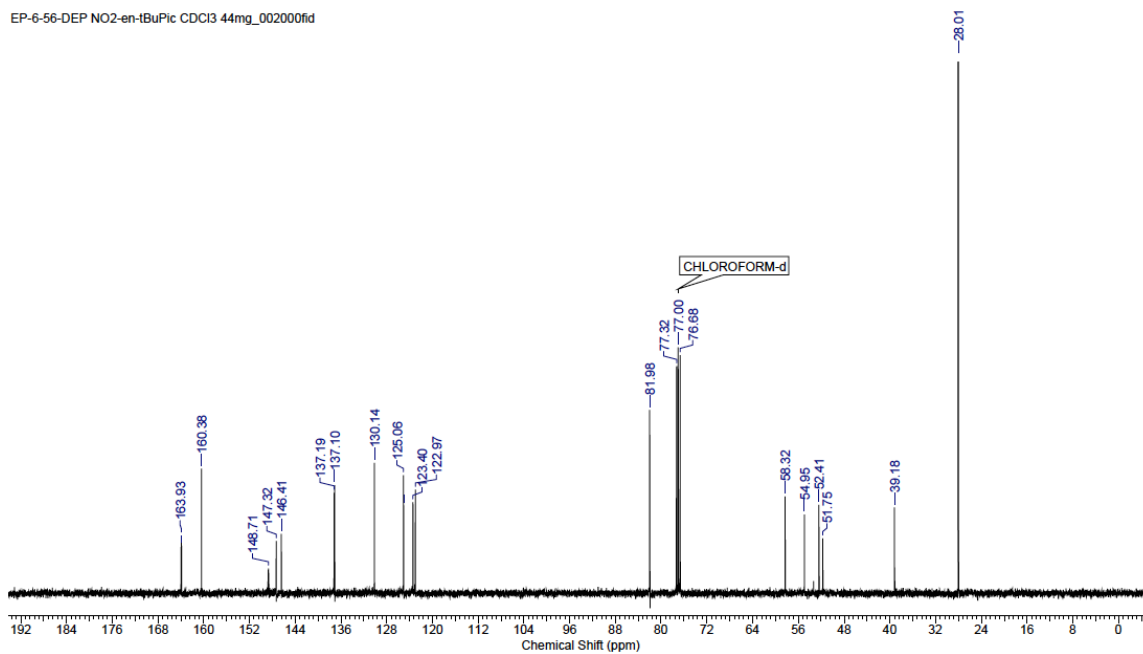

**Supplementary Figure S23.**  $^{13}\text{C}$  NMR spectrum (100 MHz,  $\text{CDCl}_3$ , RT) of *N,N'*-[6-(Methoxycarbonyl)pyridin-2-yl]methyl]-1-(*p*-nitrobenzyl)-1,2-diaminoethane (13).

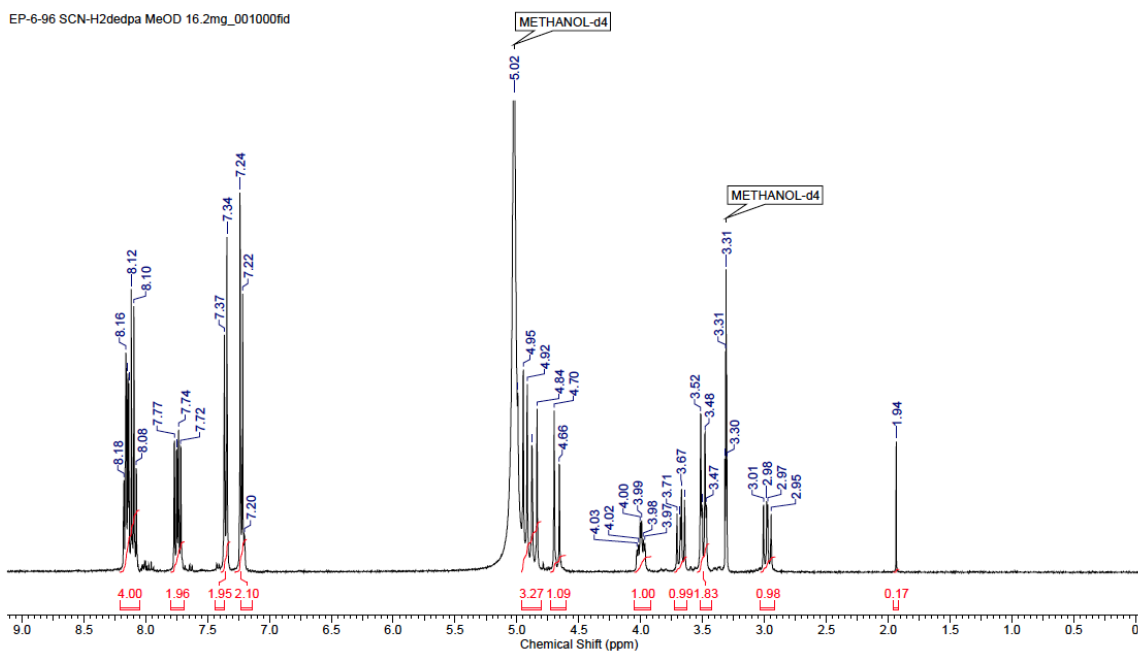

**Supplementary Figure S24.**  $^1\text{H}$  NMR spectrum (400 MHz, MeOD, RT) of *p*-SCN-Bn-H<sub>2</sub>dedpa, *N,N'*-{[(6-carboxylato)pyridin-2-yl]methyl}-1-(*p*-benzylisothiocyanato)-1,2-diaminoethane (**14**).

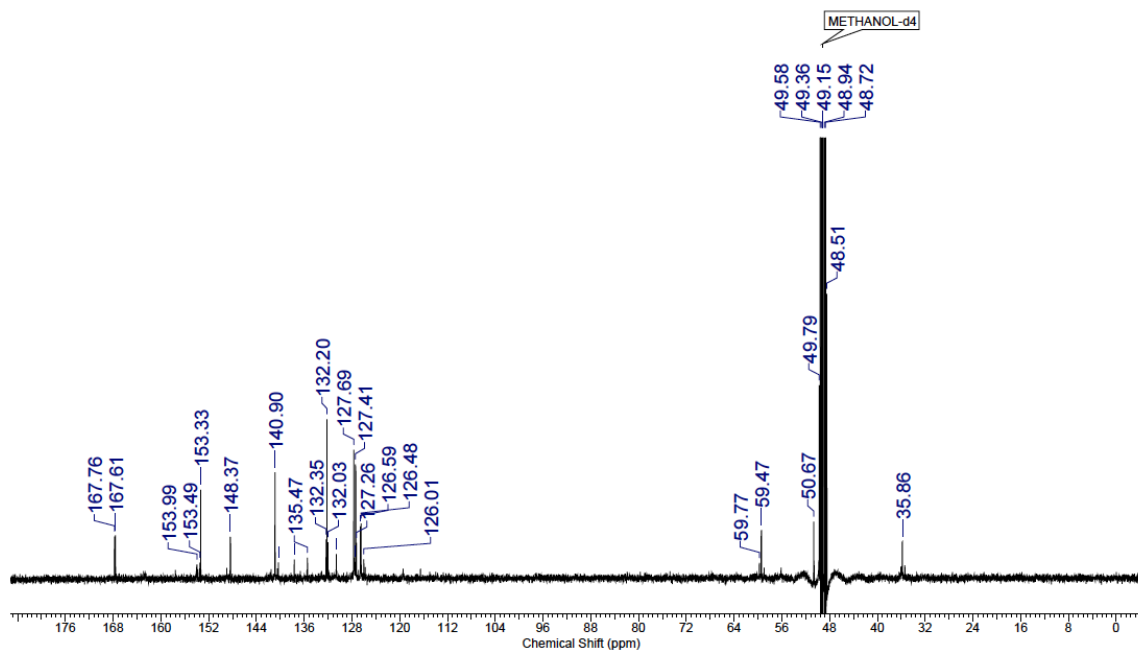

**Supplementary Figure S25.**  $^{13}\text{C}$  NMR spectrum (100 MHz, MeOD, RT) of *p*-SCN-Bn-H<sub>2</sub>dedpa, *N,N'*-{[(6-carboxylato)pyridin-2-yl]methyl}-1-(*p*-benzylisothiocyanato)-1,2-diaminoethane (**14**).

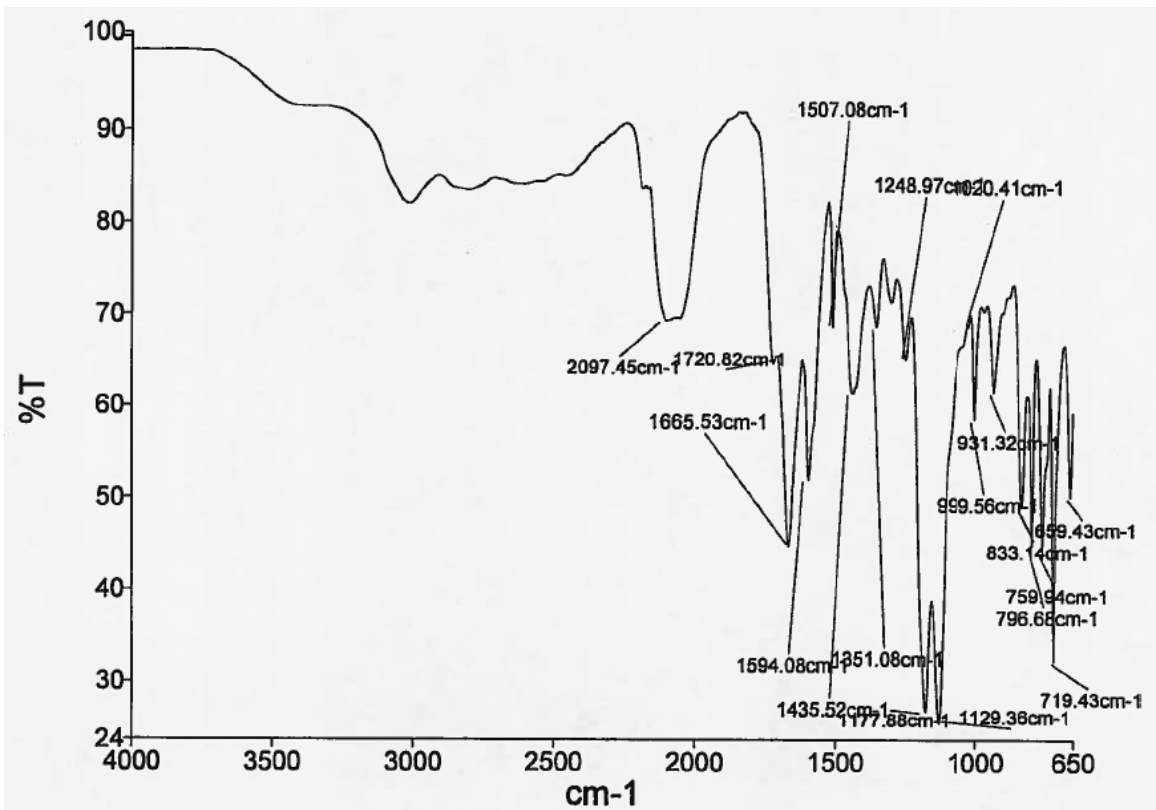

Supplementary Figure S26. ATR-IR spectrum (neat) of *p*-SCN-Bn-H<sub>2</sub>dedpa, *N,N'*-[[[(6-carboxylato)pyridin-2-yl]methyl]-1-(*p*-benzylisothiocyanato)-1,2-diaminoethane (14).

EP-6-80-co#1 CDCl<sub>3</sub> ~20 mg\_001000fid

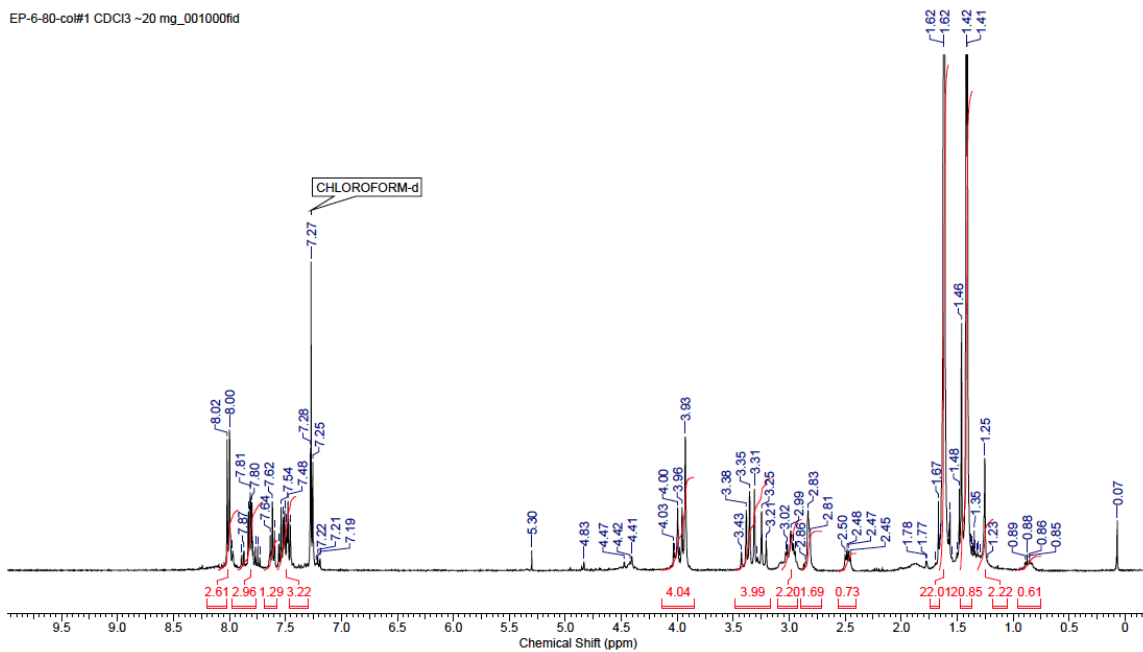

Supplementary Figure S27. <sup>1</sup>H NMR spectrum (400 MHz, CDCl<sub>3</sub>, RT) of *N,N'*-[[[(*tert*-Butoxycarbonyl)methyl]-*N,N'*-[[[(6-*tert*-butoxycarbonyl)pyridin-2-yl]methyl]-1-(*p*-nitrobenzyl)-1,2-diaminoethane (15).

EP-6-80-co#1 CDCl3 ~20 mg\_002000fid

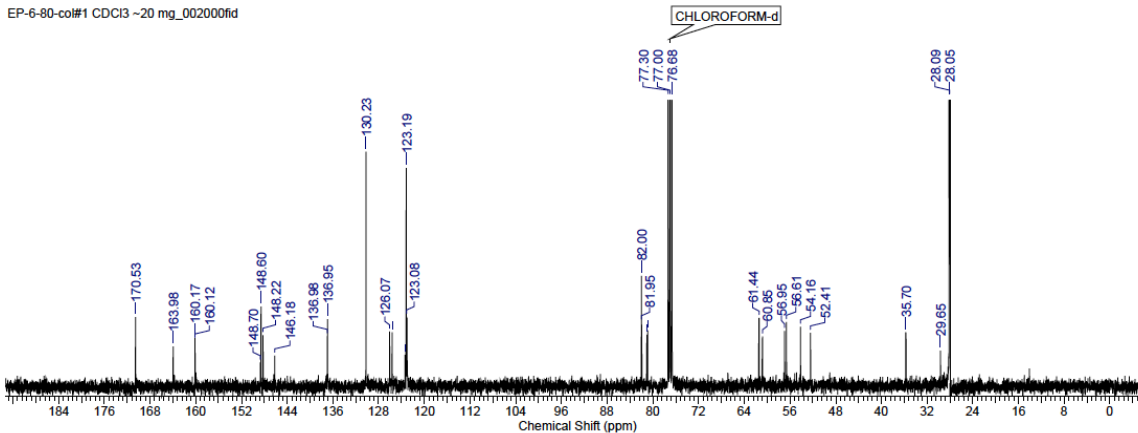

**Supplementary Figure S28.**  $^{13}\text{C}$  NMR spectrum (100 MHz,  $\text{CDCl}_3$ , RT) of *N,N'*-[*tert*-Butoxycarbonyl)methyl]-*N,N'*-{[(6-*tert*-butoxycarbonyl)pyridin-2-yl)methyl]-1-(*p*-nitrobenzyl)-1,2-diaminoethane (15).

Desktop\_001000fid

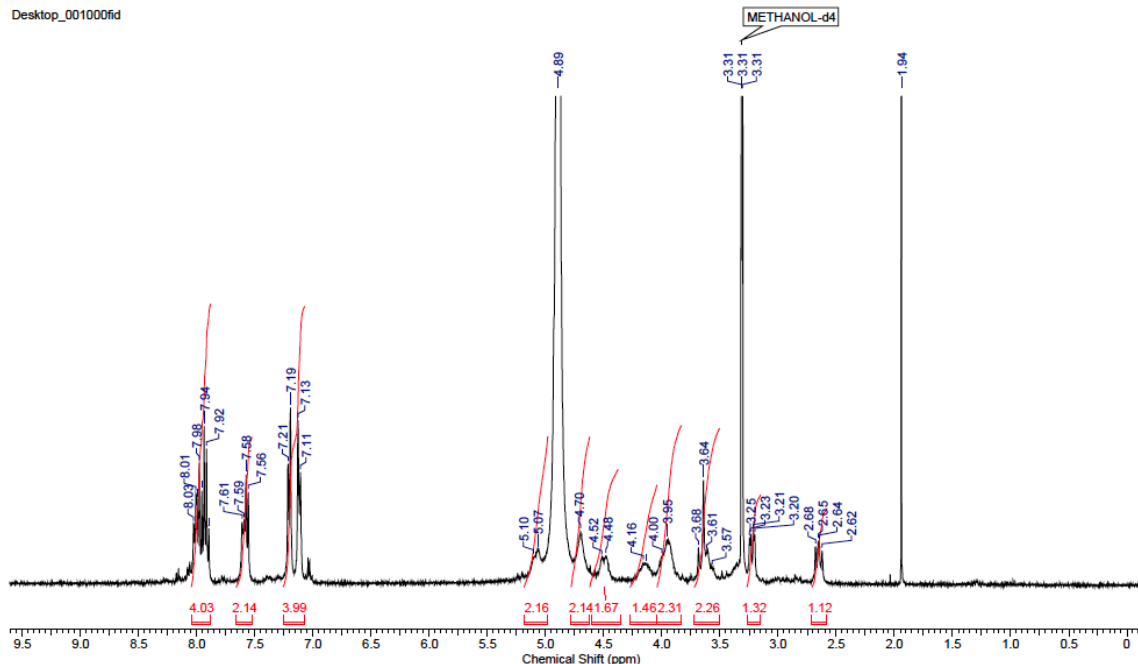

**Supplementary Figure S29.**  $^1\text{H}$  NMR spectrum (400 MHz, MeOD, RT) of *p*-SCN-Bn- $\text{H}_4$ octapa, *N,N'*-[(Carboxylato)methyl]-*N,N'*-{[(6-carboxylato)pyridin-2-yl)methyl]-1-(*p*-benzylisothiocyanato)-1,2-diaminoethane (16).

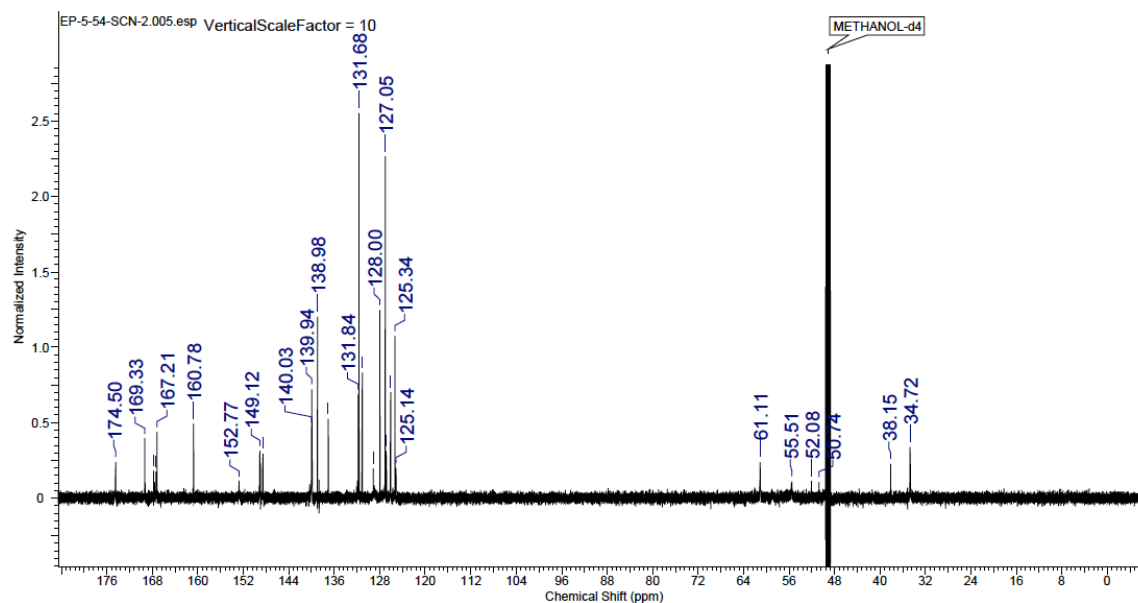

**Supplementary Figure S30.**  $^{13}\text{C}$  NMR spectrum (150 MHz, MeOD, RT) of *p*-SCN-Bn- $\text{H}_4$ octapa, *N,N'*-[[Carboxylato)methyl]-*N,N'*-[[6-carboxylato)pyridin-2-yl)methyl]-1-(*p*-benzylisothiocyanato)-1,2-diaminoethane (**16**).

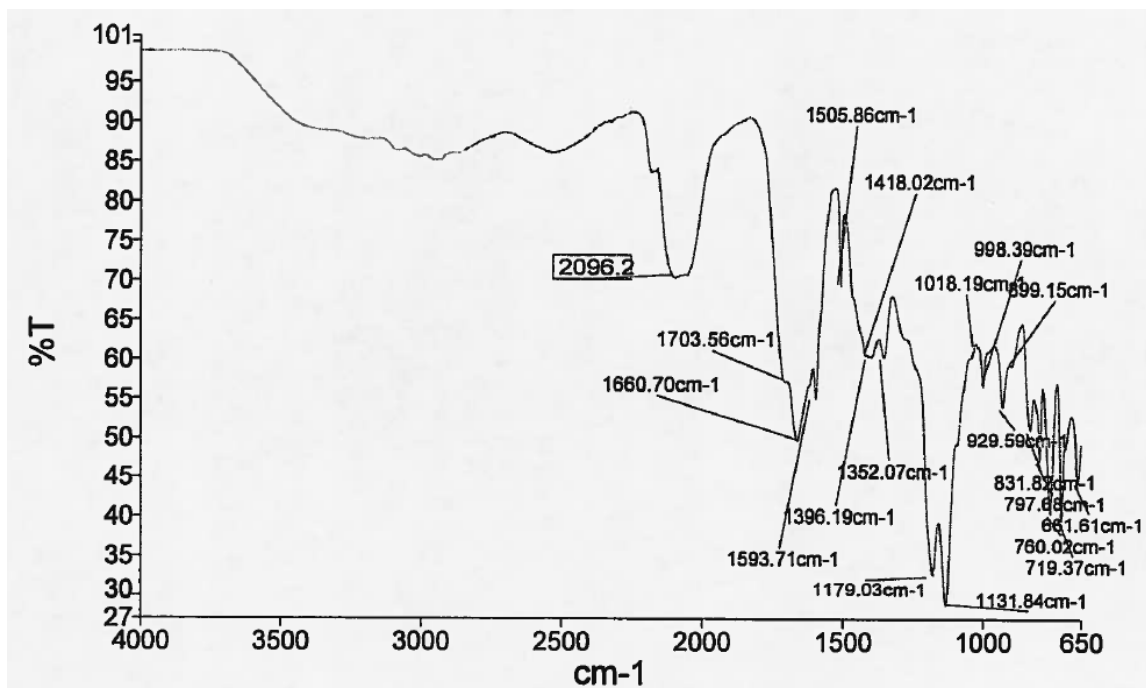

**Supplementary Figure S31.** ATR-IR spectrum (neat) of *p*-SCN-Bn- $\text{H}_4$ octapa, *N,N'*-[[Carboxylato)methyl]-*N,N'*-[[6-carboxylato)pyridin-2-yl)methyl]-1-(*p*-benzylisothiocyanato)-1,2-diaminoethane (**16**).



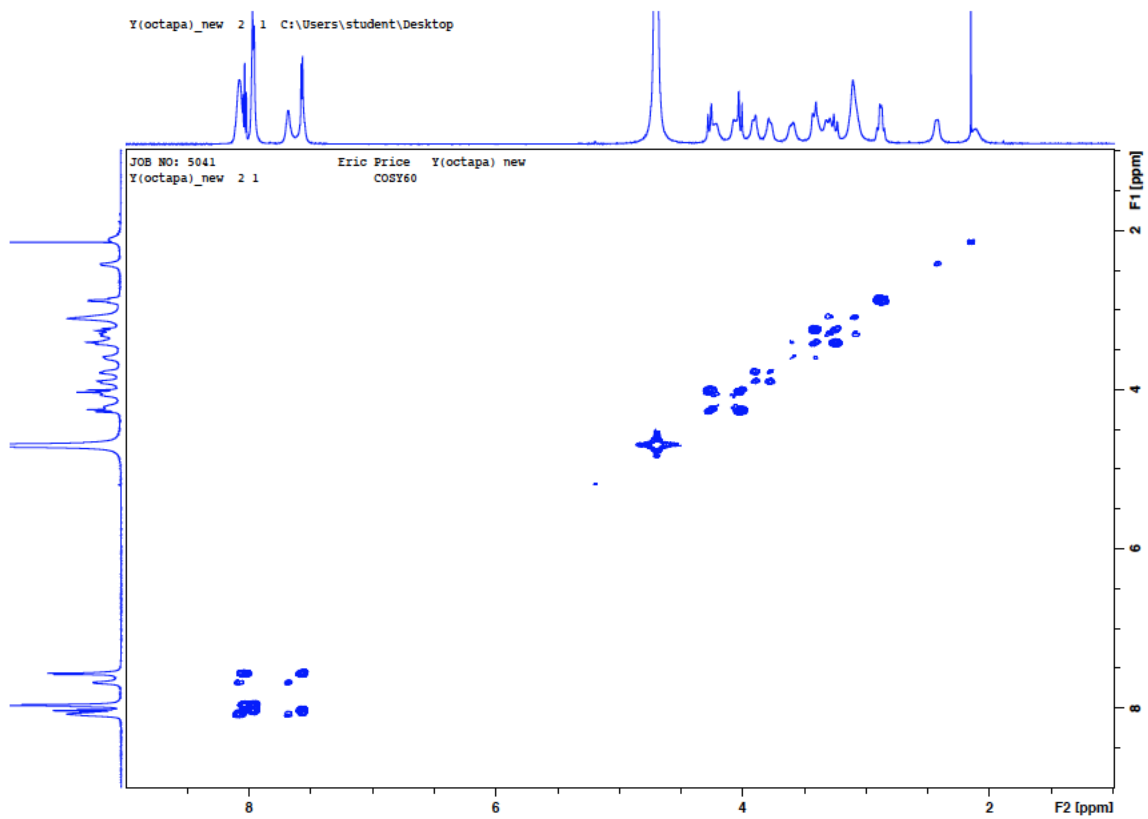

**Supplementary Figure S32.**  $^1\text{H}$ - $^1\text{H}$  COSY NMR full spectrum of [Y(octapa)]- (600 MHz,  $\text{D}_2\text{O}$ , RT).

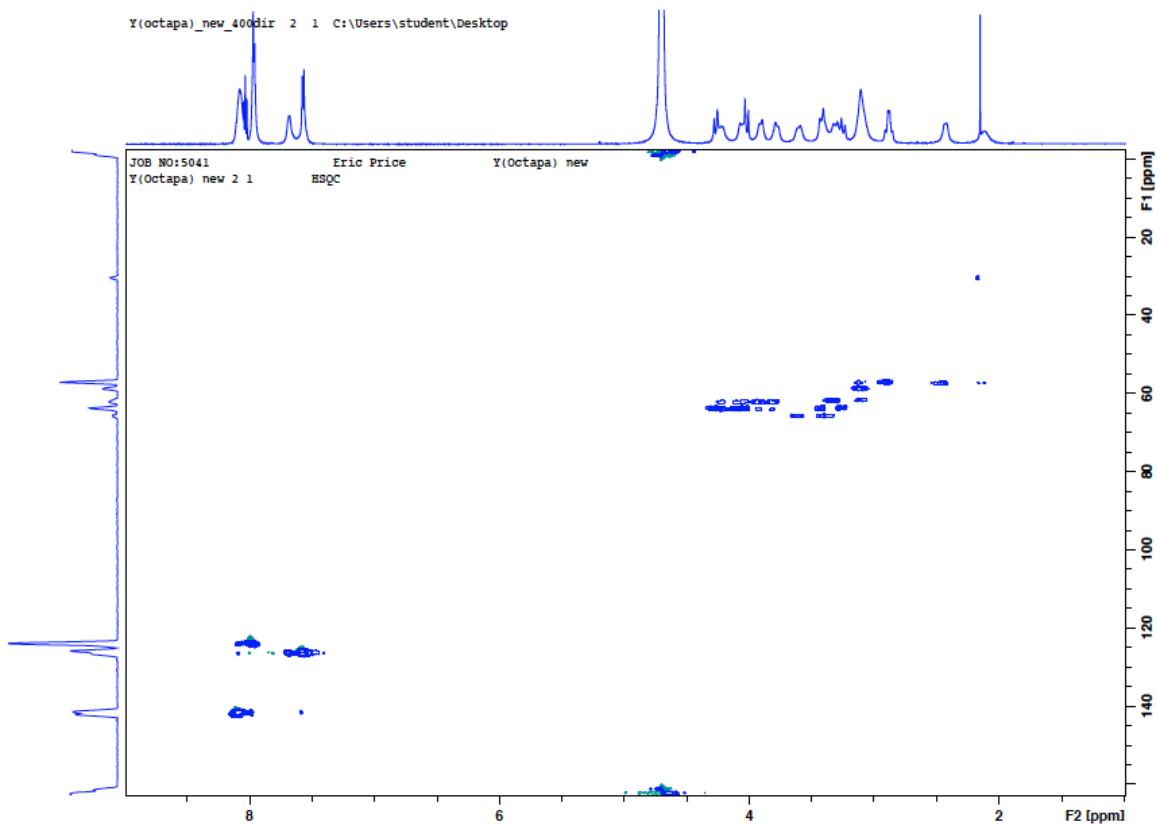

**Supplementary Figure S33.**  $^1\text{H}$ - $^{13}\text{C}$  HSQC NMR full spectrum of  $[\text{Y}(\text{octapa})]^-$  (400 MHz, 100 MHz,  $\text{D}_2\text{O}$ , RT).

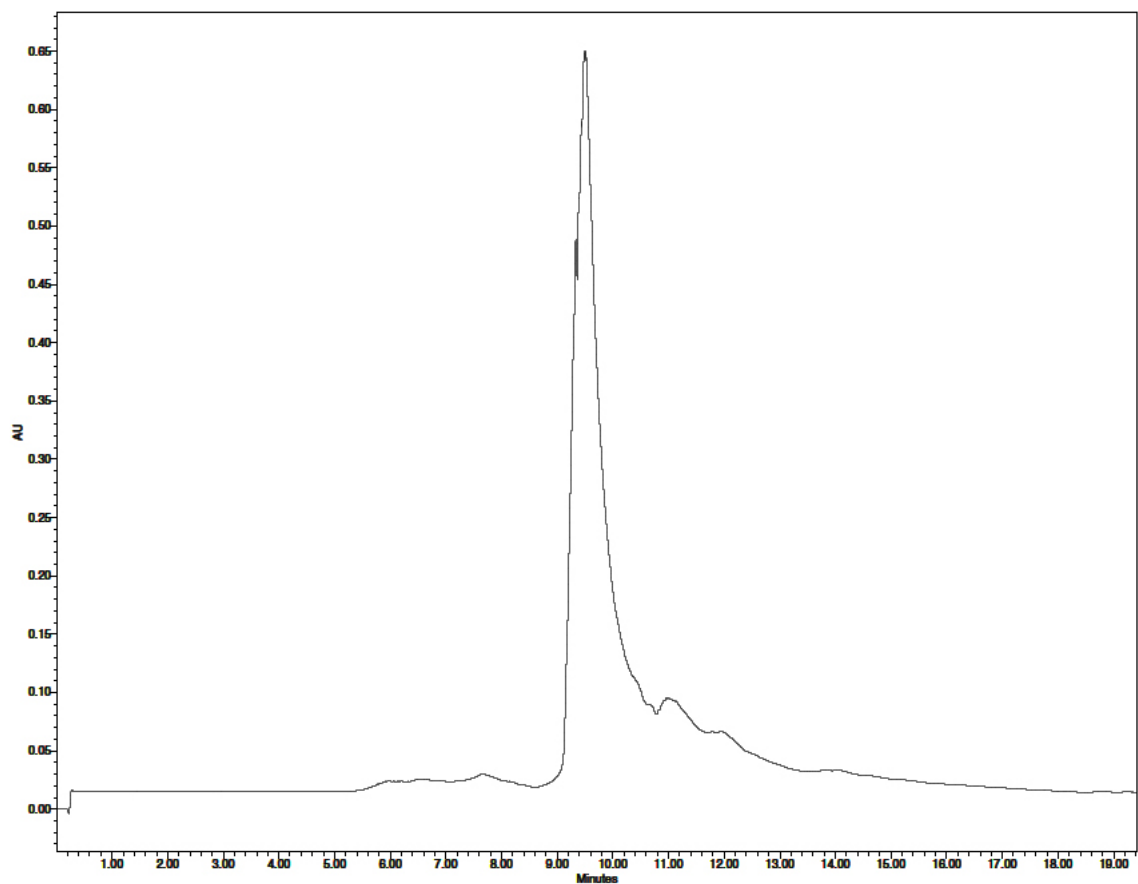

**Supplementary Figure S34.** RP-HPLC chromatograph of [Y(octapa)], mobile phase A: deionized H<sub>2</sub>O, B: acetonitrile, gradient 10% to 100% B over 30 minutes, product  $t_R = 9.5$  min.
